# Supplementary material for: C1GALT1 predicts poor prognosis and is a potential therapeutic target in head and neck cancer
Source: PubMed Central journal article supplement (PMC6202324; doi:10.1038/s41388-018-0375-0), 2018-06-21
Supplement: 41388_2018_375_MOESM1_ESM.pdf [file 41388_2018_375_MOESM1_ESM.pdf]

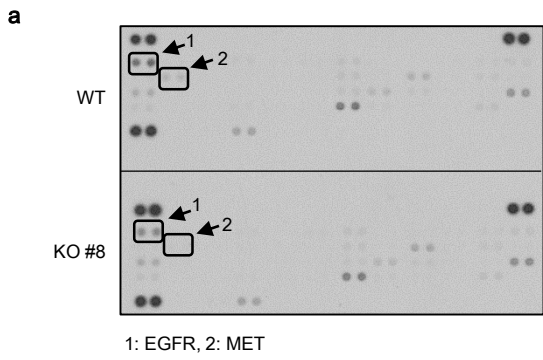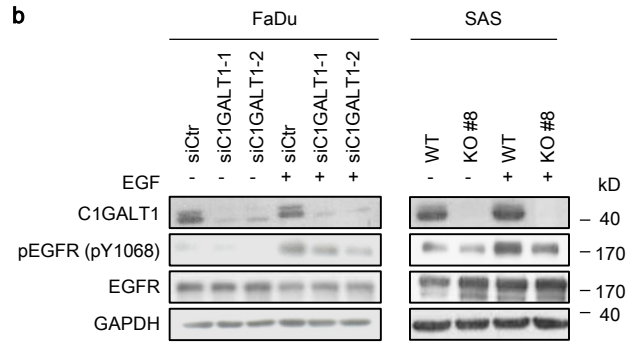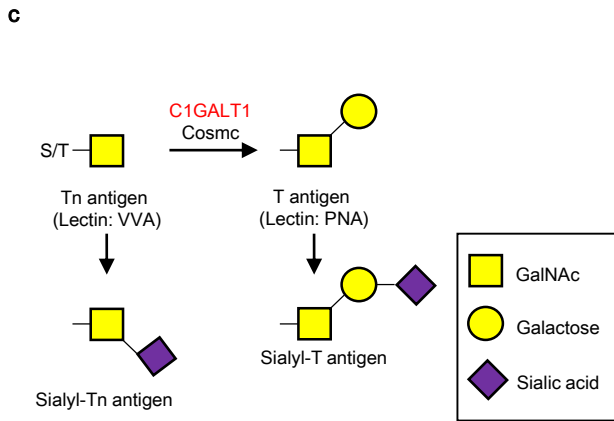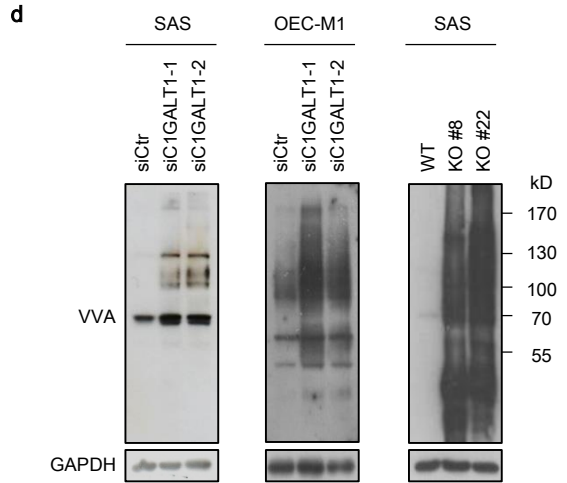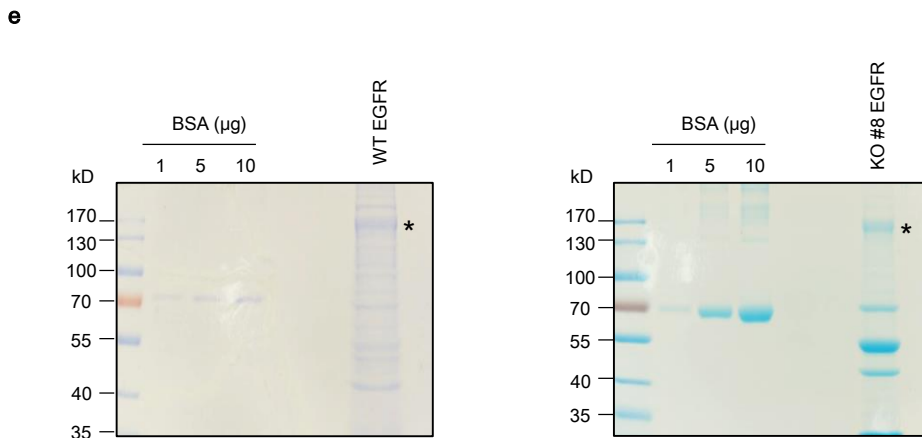

Supplementary Fig. 1

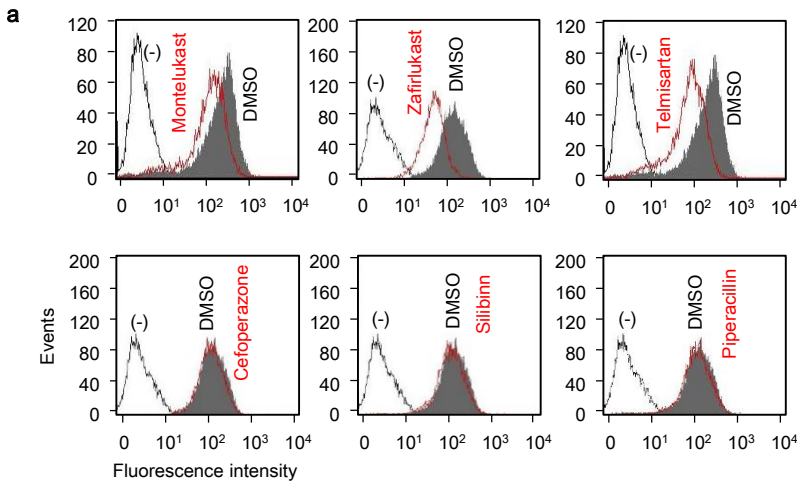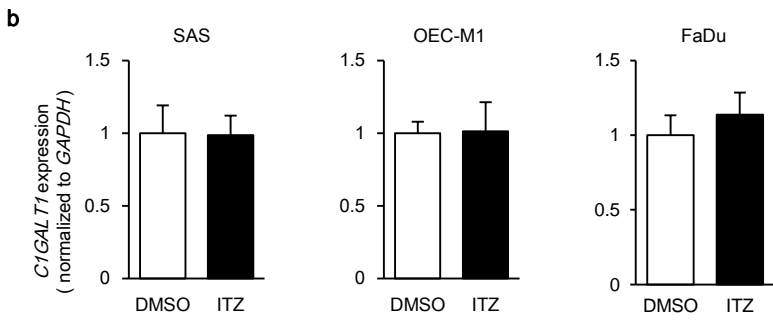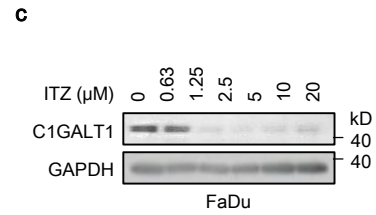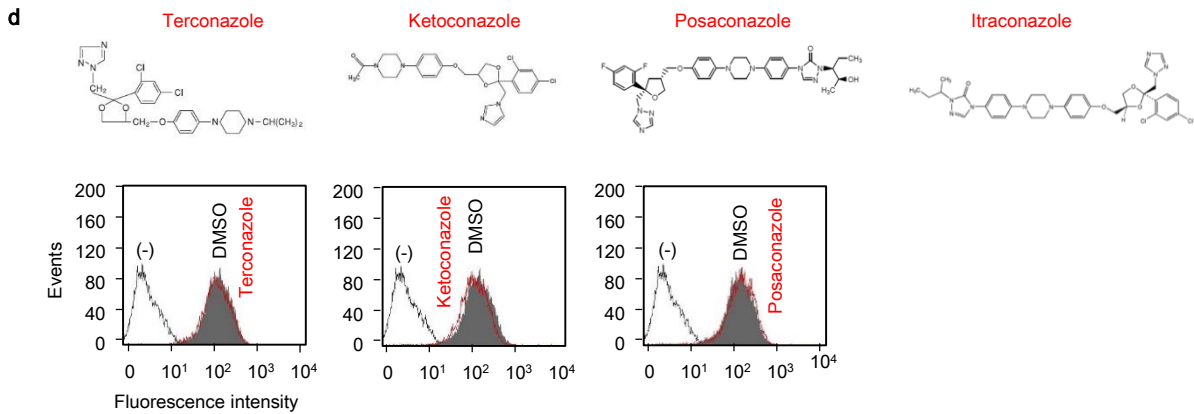

Supplementary Fig.2
